# Supplementary material
Source: publisher figshare collection journal article supplement (https://gsajournals.figshare.com/ndownloader/files/22811846)
Supplement: Supplementary file 1 [file 22811846]

## Sheet: Sheet1
	NM#	Addgene #	name	description	reference	sequence
	Landing site plasmids
	3649	154110	pCFJ1272 FRT FRT3 landing	loxP FRT FRT3 landing site in a miniMos vector	this study	GCACCGTACGTCTCGAGGAATTCTATCAGGTGTACAAGTATGAAATGTCGTTTCGAACATATAGATGTCTCGCAAACGTAAATATTTATCGATTGTCATAAAACTTTGACCTTGTGAAGTGTCAACCTTGACTGTCGAACCACCATAGTTTGGCGCGAATTGAGCGTCATAATTGTTTACTCTCAGTGCAGTCAACATGTCGAGTTTCGTGCCGAATAAAGAGCAAACGCGGACAGTATTAATTTTCTGTTTTCATTTGAAGAAAACAGCTGCGGccggatccaggaaacagctatgaccatgattacgccaagctatcaactttgtatagaaaagttgAGCTCCACCGCGGTGGCGGCCGCTCTAGAACTAGGctgtttcgAAGgtaagtttaaaATA…
	3689	154111	pCFJ1272 mex-5 FLP FRT FRT3 landing	loxP loxP FLP FRT FRT3 site in a miniMos vector	this study	GCACCGTACGTCTCGAGGAATTCTATCAGGTGTACAAGTATGAAATGTCGTTTCGAACATATAGATGTCTCGCAAACGTAAATATTTATCGATTGTCATAAAACTTTGACCTTGTGAAGTGTCAACCTTGACTGTCGAACCACCATAGTTTGGCGCGAATTGAGCGTCATAATTGTTTACTCTCAGTGCAGTCAACATGTCGAGTTTCGTGCCGAATAAAGAGCAAACGCGGACAGTATTAATTTTCTGTTTTCATTTGAAGAAAACAGCTGCGGccggatccaggaaacagctatgaccatgattacgccaagctatcaactttgtatagaaaagttgAGCTCCACCGCGGTGGCGGCCGCTCTAGAACTAGGctgtttcgAAGgtaagtttaaaATA…
	3746	154109	DR274 CT-NT LoxP FLP FRT FRT3 landing	loxP FLP FRT FRT3 landing site in a Golden Gate SapI GCG ACG assembly vector	this study	TGGGCCTTTCTTCGGTAGAAAATCAAAGGATCTTCttgagatcctttttttctgcgcgtaatctgctgcttgcaaacaaaaaaaccaccgctaccagcggtggtttgtttgccggatcaagagctaccaactctttttccgaggtaactggcttcagcagagcgcagataccaaatactgttcttctagtgtagccgtagttaggccaccacttcaagaactctgtagcaccgcctacatacctcgctctgctaatcctgttaccagtggctgctgccagtggcgataagtcgtgtcttaccgggttggactcaagacgatagttaccggataaggcgcagcggtcgggctgaacggggggttcgtgcacacagcccagcttggagcgaacgacctaca…
	3749	154108	DR274 CT-NT loxP FRT FRT3 landing	loxP FRT FRT3 landing site in a Golden Gate SapI GCG ACG assembly vector	this study	TGGGCCTTTCTTCGGTAGAAAATCAAAGGATCTTCttgagatcctttttttctgcgcgtaatctgctgcttgcaaacaaaaaaaccaccgctaccagcggtggtttgtttgccggatcaagagctaccaactctttttccgaggtaactggcttcagcagagcgcagataccaaatactgttcttctagtgtagccgtagttaggccaccacttcaagaactctgtagcaccgcctacatacctcgctctgctaatcctgttaccagtggctgctgccagtggcgataagtcgtgtcttaccgggttggactcaagacgatagttaccggataaggcgcagcggtcgggctgaacggggggttcgtgcacacagcccagcttggagcgaacgacctaca…
	Integration plasmids
	3643	153083	pLF3FShC mec-4p GFP-C1	loxP SapI MCS FRT3 FRT hygR sqt-1 hs cre vector for RCME integration	this study	GAAGTTCCTATTCtctagaaaGTATAGGAACTTCATGAAAAAGCCTGAACTCACCGCGACGTCTGTCGAGAAGTTTCTGATCGAAAAGTTCGACAGCGTCTCCGACCTGATGCAGCTCTCGGAGGGCGAAGAATCTCGTGCTTTCAGCTTCGATGTAGGAGGGCGTGGATATGTCCTGCGGGTAAATAGCTGCGCCGATGGTTTCTACAAAGATCGTTATGTTTATCGGCACTTTGCATCGGCCGCGCTCCCGATTCCGGAAGTGCTTGACATTGGGGAATTCAGCGAGAGCCTGACCTATTGCATCTCCCGCCGTGCACAGGGTGTCACGTTGCAAGACCTGCCTGAAACCGAACTGCCCGCTGTTCTGCAGCCGGTCGCGGAGGCCATGGATGCGAT…
	3732	153086	pLF3FShC mec-4p GFP-C1	mec-4 promoter driving GFP-C1 in an RCME vector	this study	GAAGTTCCTATTCtctagaaaGTATAGGAACTTCATGAAAAAGCCTGAACTCACCGCGACGTCTGTCGAGAAGTTTCTGATCGAAAAGTTCGACAGCGTCTCCGACCTGATGCAGCTCTCGGAGGGCGAAGAATCTCGTGCTTTCAGCTTCGATGTAGGAGGGCGTGGATATGTCCTGCGGGTAAATAGCTGCGCCGATGGTTTCTACAAAGATCGTTATGTTTATCGGCACTTTGCATCGGCCGCGCTCCCGATTCCGGAAGTGCTTGACATTGGGGAATTCAGCGAGAGCCTGACCTATTGCATCTCCCGCCGTGCACAGGGTGTCACGTTGCAAGACCTGCCTGAAACCGAACTGCCCGCTGTTCTGCAGCCGGTCGCGGAGGCCATGGATGCGAT…
	reporter plasmids
	3724	154112	pLFF3SHC tetO 7X ∆pes-10 GFP-C1	tetO 7X ∆pes-10 promoter driving GFP-C1 in an RCME vector	this study	GAAGTTCCTATTCtctagaaaGTATAGGAACTTCATGAAAAAGCCTGAACTCACCGCGACGTCTGTCGAGAAGTTTCTGATCGAAAAGTTCGACAGCGTCTCCGACCTGATGCAGCTCTCGGAGGGCGAAGAATCTCGTGCTTTCAGCTTCGATGTAGGAGGGCGTGGATATGTCCTGCGGGTAAATAGCTGCGCCGATGGTTTCTACAAAGATCGTTATGTTTATCGGCACTTTGCATCGGCCGCGCTCCCGATTCCGGAAGTGCTTGACATTGGGGAATTCAGCGAGAGCCTGACCTATTGCATCTCCCGCCGTGCACAGGGTGTCACGTTGCAAGACCTGCCTGAAACCGAACTGCCCGCTGTTCTGCAGCCGGTCGCGGAGGCCATGGATGCGAT…
	3725	154113	pLF3FShC UAS 11X ∆pes-10 GFP-C1	UAS 11X ∆pes-10 promoter driving GFP-C1 in an RCME vector	this study	GAAGTTCCTATTCtctagaaaGTATAGGAACTTCATGAAAAAGCCTGAACTCACCGCGACGTCTGTCGAGAAGTTTCTGATCGAAAAGTTCGACAGCGTCTCCGACCTGATGCAGCTCTCGGAGGGCGAAGAATCTCGTGCTTTCAGCTTCGATGTAGGAGGGCGTGGATATGTCCTGCGGGTAAATAGCTGCGCCGATGGTTTCTACAAAGATCGTTATGTTTATCGGCACTTTGCATCGGCCGCGCTCCCGATTCCGGAAGTGCTTGACATTGGGGAATTCAGCGAGAGCCTGACCTATTGCATCTCCCGCCGTGCACAGGGTGTCACGTTGCAAGACCTGCCTGAAACCGAACTGCCCGCTGTTCTGCAGCCGGTCGCGGAGGCCATGGATGCGAT…
	3726	154114	pLF3FShC QUAS 5X ∆pes-10 GFP-C1	QUAS 5X ∆pes-10 promoter driving GFP-C1 in an RCME vector	this study	GAAGTTCCTATTCtctagaaaGTATAGGAACTTCATGAAAAAGCCTGAACTCACCGCGACGTCTGTCGAGAAGTTTCTGATCGAAAAGTTCGACAGCGTCTCCGACCTGATGCAGCTCTCGGAGGGCGAAGAATCTCGTGCTTTCAGCTTCGATGTAGGAGGGCGTGGATATGTCCTGCGGGTAAATAGCTGCGCCGATGGTTTCTACAAAGATCGTTATGTTTATCGGCACTTTGCATCGGCCGCGCTCCCGATTCCGGAAGTGCTTGACATTGGGGAATTCAGCGAGAGCCTGACCTATTGCATCTCCCGCCGTGCACAGGGTGTCACGTTGCAAGACCTGCCTGAAACCGAACTGCCCGCTGTTCTGCAGCCGGTCGCGGAGGCCATGGATGCGAT…
	3727	154115	pLF3FShC lexO 5X ∆pes-10 GFP-C1	lexO 5X ∆pes-10 promoter driving GFP-C1 in an RCME vector	this study	GAAGTTCCTATTCtctagaaaGTATAGGAACTTCATGAAAAAGCCTGAACTCACCGCGACGTCTGTCGAGAAGTTTCTGATCGAAAAGTTCGACAGCGTCTCCGACCTGATGCAGCTCTCGGAGGGCGAAGAATCTCGTGCTTTCAGCTTCGATGTAGGAGGGCGTGGATATGTCCTGCGGGTAAATAGCTGCGCCGATGGTTTCTACAAAGATCGTTATGTTTATCGGCACTTTGCATCGGCCGCGCTCCCGATTCCGGAAGTGCTTGACATTGGGGAATTCAGCGAGAGCCTGACCTATTGCATCTCCCGCCGTGCACAGGGTGTCACGTTGCAAGACCTGCCTGAAACCGAACTGCCCGCTGTTCTGCAGCCGGTCGCGGAGGCCATGGATGCGAT…
	3755	154116	pLF3FShC tetO 7X GFP-C1 act-4 3'UTR	tetO 7X ∆pes-10 promoter driving GFP-C1 & an act-4 3' UTR in a RMCE vector	this study	GAAGTTCCTATTCtctagaaaGTATAGGAACTTCATGAAAAAGCCTGAACTCACCGCGACGTCTGTCGAGAAGTTTCTGATCGAAAAGTTCGACAGCGTCTCCGACCTGATGCAGCTCTCGGAGGGCGAAGAATCTCGTGCTTTCAGCTTCGATGTAGGAGGGCGTGGATATGTCCTGCGGGTAAATAGCTGCGCCGATGGTTTCTACAAAGATCGTTATGTTTATCGGCACTTTGCATCGGCCGCGCTCCCGATTCCGGAAGTGCTTGACATTGGGGAATTCAGCGAGAGCCTGACCTATTGCATCTCCCGCCGTGCACAGGGTGTCACGTTGCAAGACCTGCCTGAAACCGAACTGCCCGCTGTTCTGCAGCCGGTCGCGGAGGCCATGGATGCGAT…
	3774	154117	pLFF3SHC tetO 7X ∆mec-7p GFP-C1	tetO 7X enhancer with ∆mec-7 basal promoter driving GFP-C1	this study	GAAGTTCCTATTCtctagaaaGTATAGGAACTTCATGAAAAAGCCTGAACTCACCGCGACGTCTGTCGAGAAGTTTCTGATCGAAAAGTTCGACAGCGTCTCCGACCTGATGCAGCTCTCGGAGGGCGAAGAATCTCGTGCTTTCAGCTTCGATGTAGGAGGGCGTGGATATGTCCTGCGGGTAAATAGCTGCGCCGATGGTTTCTACAAAGATCGTTATGTTTATCGGCACTTTGCATCGGCCGCGCTCCCGATTCCGGAAGTGCTTGACATTGGGGAATTCAGCGAGAGCCTGACCTATTGCATCTCCCGCCGTGCACAGGGTGTCACGTTGCAAGACCTGCCTGAAACCGAACTGCCCGCTGTTCTGCAGCCGGTCGCGGAGGCCATGGATGCGAT…
	driver plasmids
	3734	154118	pLF3FShC mec-4p GAL-4 QFAD	mec-4 promoter driving GAL4-QFAD in an RCME vector	this study	GAAGTTCCTATTCtctagaaaGTATAGGAACTTCATGAAAAAGCCTGAACTCACCGCGACGTCTGTCGAGAAGTTTCTGATCGAAAAGTTCGACAGCGTCTCCGACCTGATGCAGCTCTCGGAGGGCGAAGAATCTCGTGCTTTCAGCTTCGATGTAGGAGGGCGTGGATATGTCCTGCGGGTAAATAGCTGCGCCGATGGTTTCTACAAAGATCGTTATGTTTATCGGCACTTTGCATCGGCCGCGCTCCCGATTCCGGAAGTGCTTGACATTGGGGAATTCAGCGAGAGCCTGACCTATTGCATCTCCCGCCGTGCACAGGGTGTCACGTTGCAAGACCTGCCTGAAACCGAACTGCCCGCTGTTCTGCAGCCGGTCGCGGAGGCCATGGATGCGAT…
	3810	154119	pLF3fShC mec-4p QF act-4 3'UTR	mec-4 promoter driving QF in an RCME vector	this study	GAAGTTCCTATTCtctagaaaGTATAGGAACTTCATGAAAAAGCCTGAACTCACCGCGACGTCTGTCGAGAAGTTTCTGATCGAAAAGTTCGACAGCGTCTCCGACCTGATGCAGCTCTCGGAGGGCGAAGAATCTCGTGCTTTCAGCTTCGATGTAGGAGGGCGTGGATATGTCCTGCGGGTAAATAGCTGCGCCGATGGTTTCTACAAAGATCGTTATGTTTATCGGCACTTTGCATCGGCCGCGCTCCCGATTCCGGAAGTGCTTGACATTGGGGAATTCAGCGAGAGCCTGACCTATTGCATCTCCCGCCGTGCACAGGGTGTCACGTTGCAAGACCTGCCTGAAACCGAACTGCCCGCTGTTCTGCAGCCGGTCGCGGAGGCCATGGATGCGAT…
	3811	154120	pLF3fShC mec-4p QF2 act-4 3'UTR	mec-4 promoter driving QF2 in an RCME vector	this study	GAAGTTCCTATTCtctagaaaGTATAGGAACTTCATGAAAAAGCCTGAACTCACCGCGACGTCTGTCGAGAAGTTTCTGATCGAAAAGTTCGACAGCGTCTCCGACCTGATGCAGCTCTCGGAGGGCGAAGAATCTCGTGCTTTCAGCTTCGATGTAGGAGGGCGTGGATATGTCCTGCGGGTAAATAGCTGCGCCGATGGTTTCTACAAAGATCGTTATGTTTATCGGCACTTTGCATCGGCCGCGCTCCCGATTCCGGAAGTGCTTGACATTGGGGAATTCAGCGAGAGCCTGACCTATTGCATCTCCCGCCGTGCACAGGGTGTCACGTTGCAAGACCTGCCTGAAACCGAACTGCCCGCTGTTCTGCAGCCGGTCGCGGAGGCCATGGATGCGAT…
	3813	154121	pLF3fShC mec-4p lexA-L-QF act-4 3'UTR	mec-4 promoter driving lexA-L-QFAD in an RCME vector	this study	GAAGTTCCTATTCtctagaaaGTATAGGAACTTCATGAAAAAGCCTGAACTCACCGCGACGTCTGTCGAGAAGTTTCTGATCGAAAAGTTCGACAGCGTCTCCGACCTGATGCAGCTCTCGGAGGGCGAAGAATCTCGTGCTTTCAGCTTCGATGTAGGAGGGCGTGGATATGTCCTGCGGGTAAATAGCTGCGCCGATGGTTTCTACAAAGATCGTTATGTTTATCGGCACTTTGCATCGGCCGCGCTCCCGATTCCGGAAGTGCTTGACATTGGGGAATTCAGCGAGAGCCTGACCTATTGCATCTCCCGCCGTGCACAGGGTGTCACGTTGCAAGACCTGCCTGAAACCGAACTGCCCGCTGTTCTGCAGCCGGTCGCGGAGGCCATGGATGCGAT…
	3814	154122	pLF3fShC mec-4p rtetR-L-QF act-4 3'UTR	mec-4 promoter driving rtetR-L-QFAD in an RCME vector	this study	GAAGTTCCTATTCtctagaaaGTATAGGAACTTCATGAAAAAGCCTGAACTCACCGCGACGTCTGTCGAGAAGTTTCTGATCGAAAAGTTCGACAGCGTCTCCGACCTGATGCAGCTCTCGGAGGGCGAAGAATCTCGTGCTTTCAGCTTCGATGTAGGAGGGCGTGGATATGTCCTGCGGGTAAATAGCTGCGCCGATGGTTTCTACAAAGATCGTTATGTTTATCGGCACTTTGCATCGGCCGCGCTCCCGATTCCGGAAGTGCTTGACATTGGGGAATTCAGCGAGAGCCTGACCTATTGCATCTCCCGCCGTGCACAGGGTGTCACGTTGCAAGACCTGCCTGAAACCGAACTGCCCGCTGTTCTGCAGCCGGTCGCGGAGGCCATGGATGCGAT…
	3823	154123	pLF3FShC mec-4p tetR-L-QF	mec-4 promoter driving tetR-L-QFAD in an RCME vector	this study	GAAGTTCCTATTCtctagaaaGTATAGGAACTTCATGAAAAAGCCTGAACTCACCGCGACGTCTGTCGAGAAGTTTCTGATCGAAAAGTTCGACAGCGTCTCCGACCTGATGCAGCTCTCGGAGGGCGAAGAATCTCGTGCTTTCAGCTTCGATGTAGGAGGGCGTGGATATGTCCTGCGGGTAAATAGCTGCGCCGATGGTTTCTACAAAGATCGTTATGTTTATCGGCACTTTGCATCGGCCGCGCTCCCGATTCCGGAAGTGCTTGACATTGGGGAATTCAGCGAGAGCCTGACCTATTGCATCTCCCGCCGTGCACAGGGTGTCACGTTGCAAGACCTGCCTGAAACCGAACTGCCCGCTGTTCTGCAGCCGGTCGCGGAGGCCATGGATGCGAT…
